# Supplementary figures and images for: Phase II study of nivolumab and salvage nivolumab/ipilimumab in treatment-naïve patients with advanced non-clear cell renal cell carcinoma (HCRN GU16-260-Cohort B)
Source: PubMed Central journal article supplement — J Immunother Cancer. 2023 Mar 22;11(3):e004780. doi: 10.1136/jitc-2022-004780 (PMC10040058; doi:10.1136/jitc-2022-004780), 2023-03-22

Supplemental Figure S1:

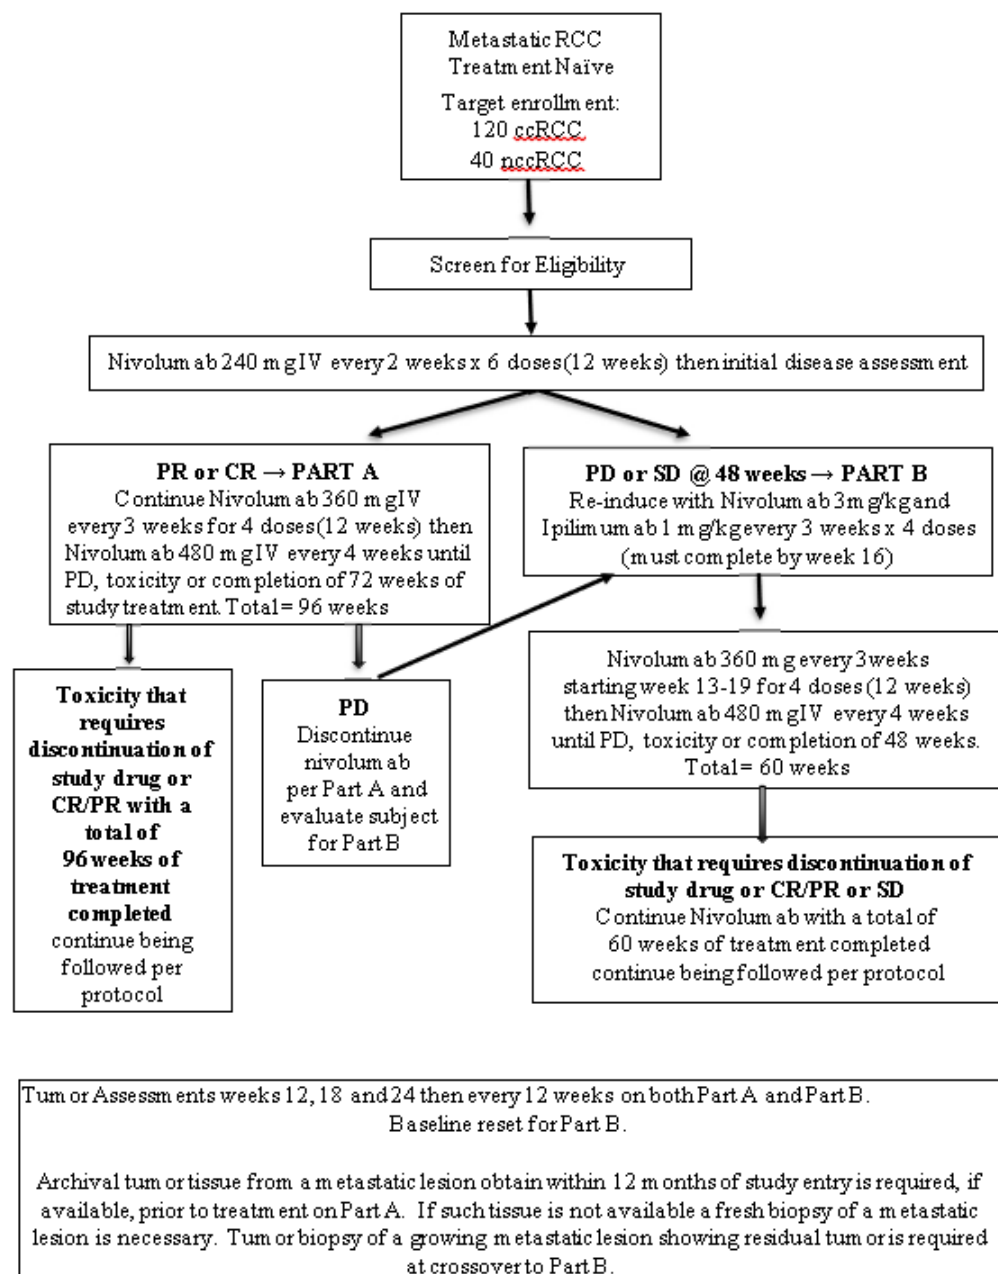

Supplement: jitc-2022-004780supp001.pdf [file jitc-2022-004780supp001.pdf]

Duration of Response on Part A

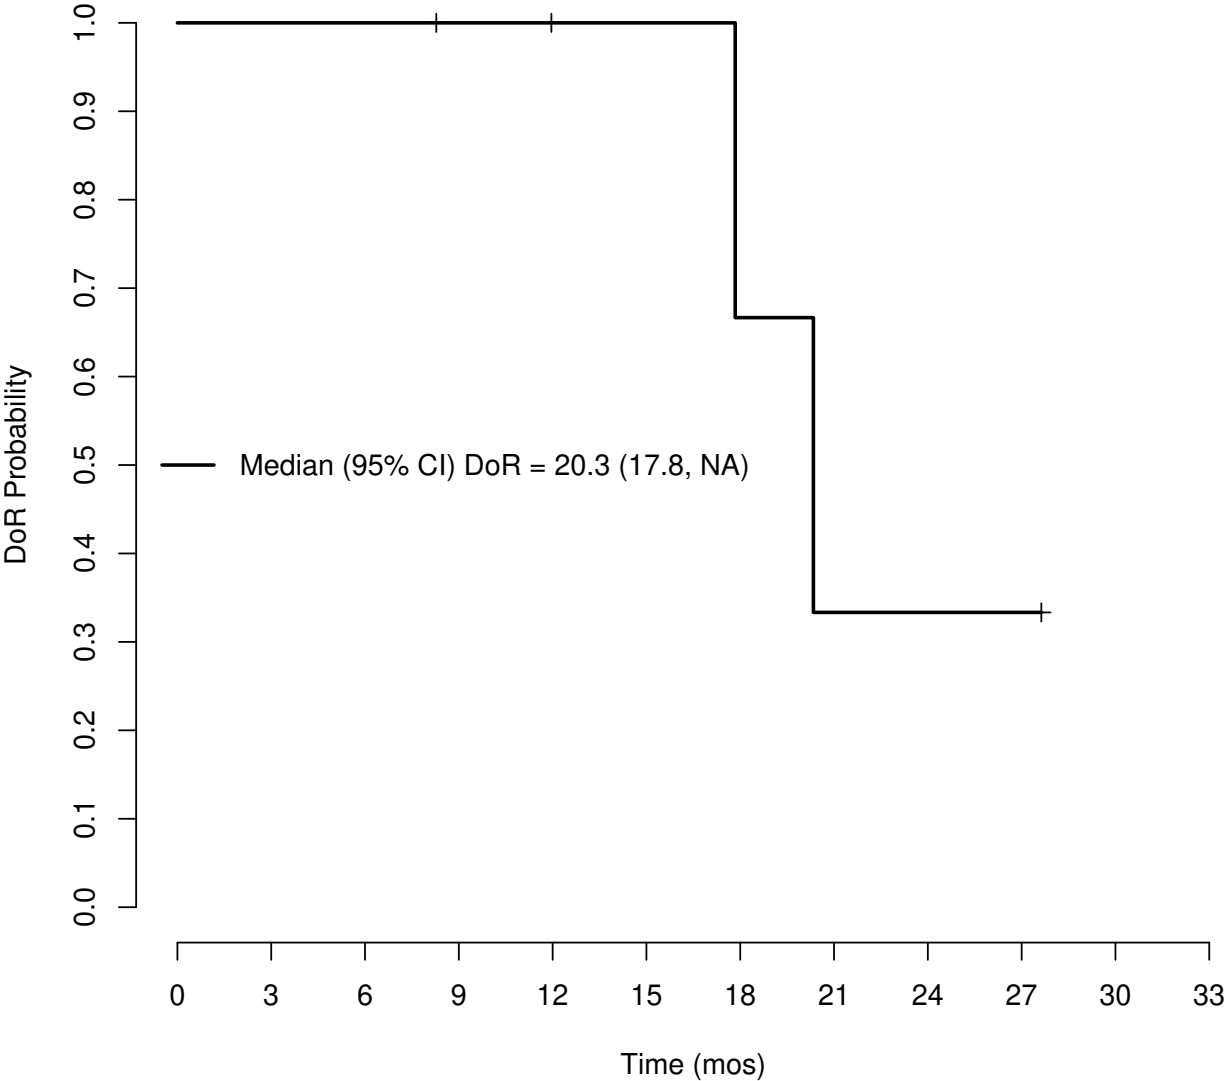

Supplement: jitc-2022-004780supp002.pdf [file jitc-2022-004780supp002.pdf]

### Swimmer Plot (n=35)

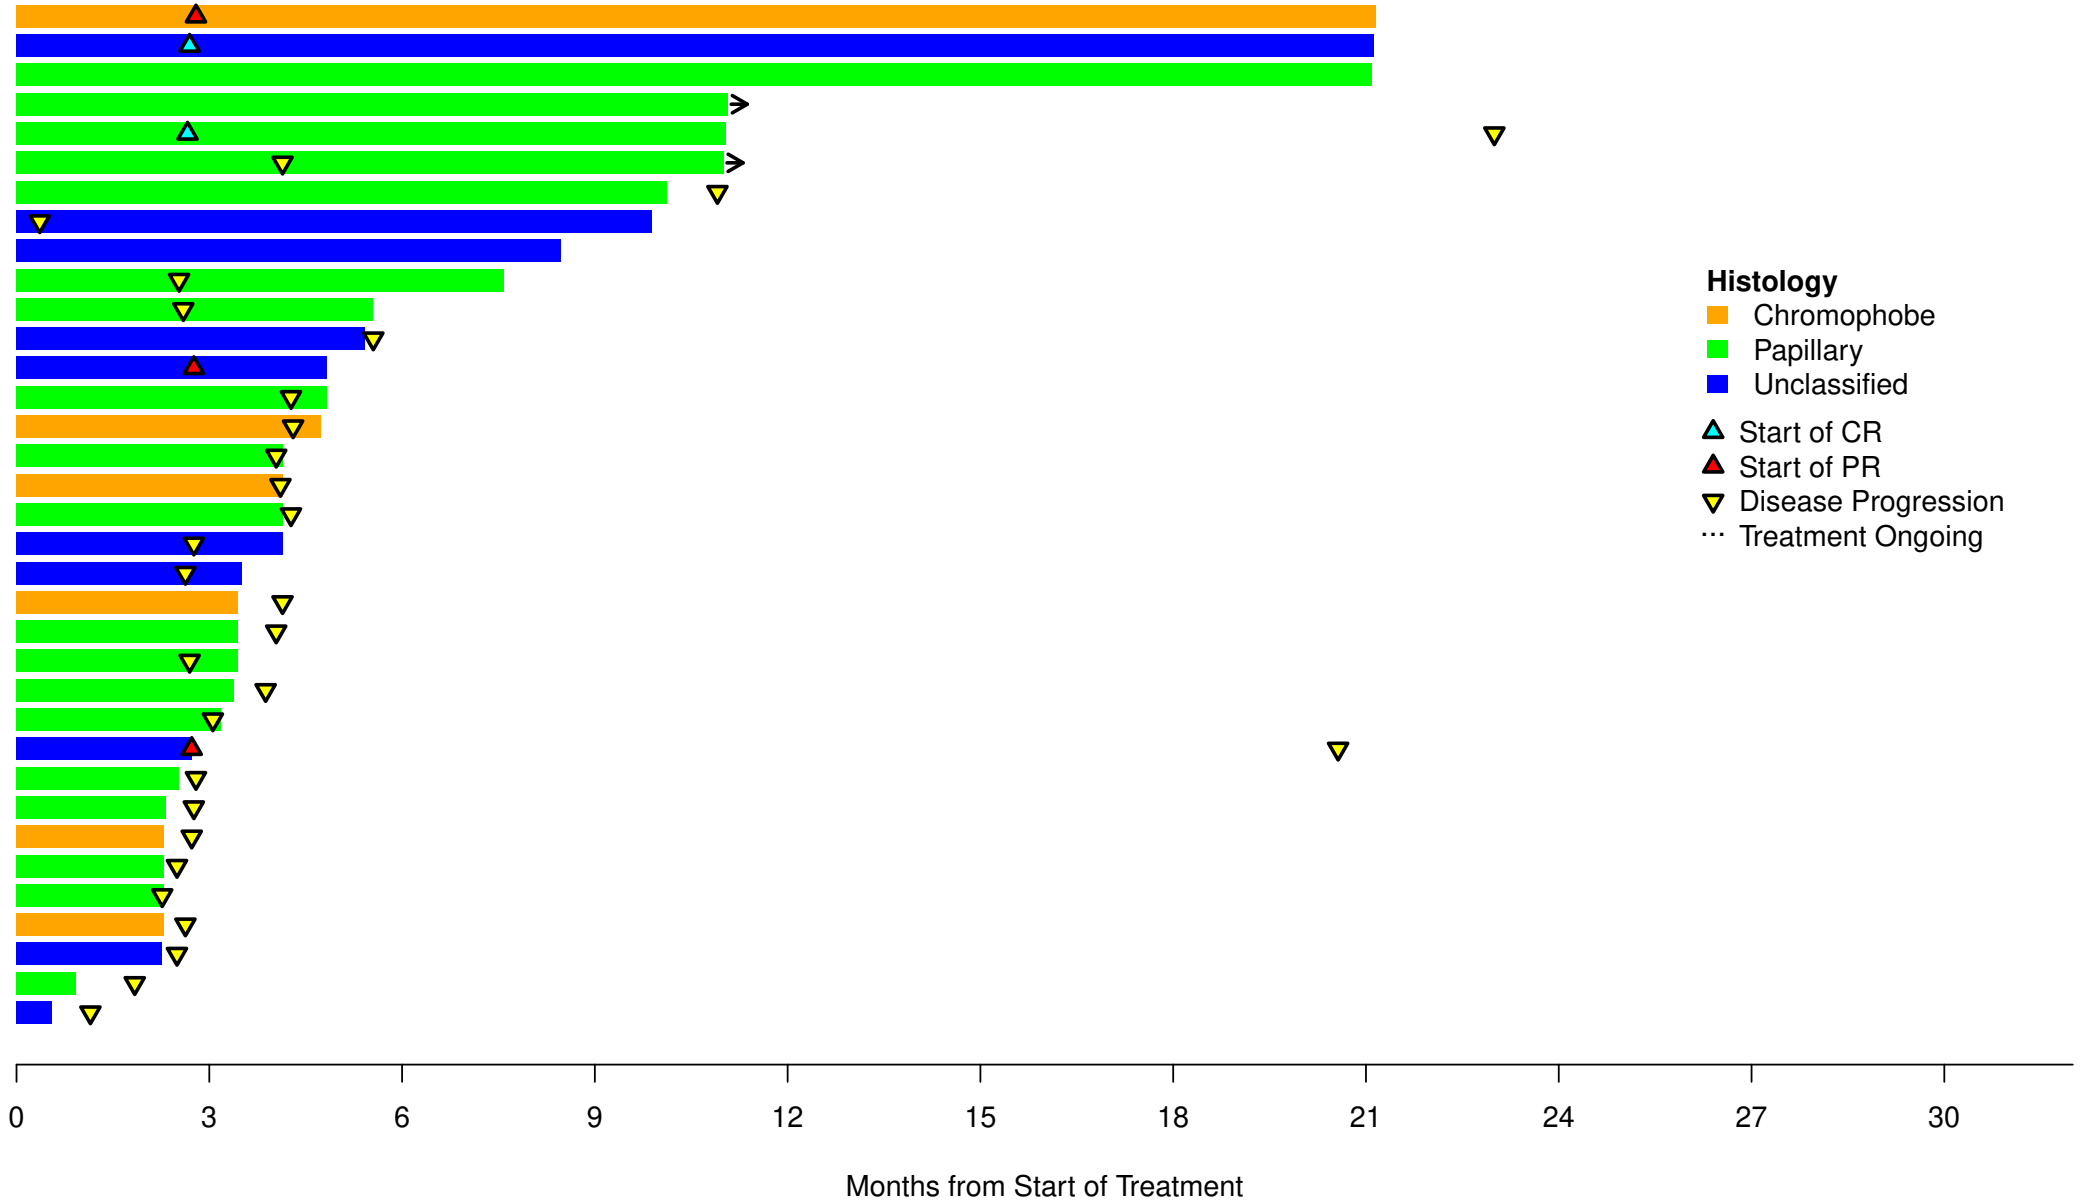

Supplement: jitc-2022-004780supp003.pdf [file jitc-2022-004780supp003.pdf]
