# Supplementary figures and images for: Phase II study of nivolumab and salvage nivolumab/ipilimumab in treatment-naïve patients with advanced non-clear cell renal cell carcinoma (HCRN GU16-260-Cohort B)
Source: HighWire-hosted journal article supplement (doi:10.1136/jitc-2022-004780), 2023-03-01

Supplemental Figure S1:

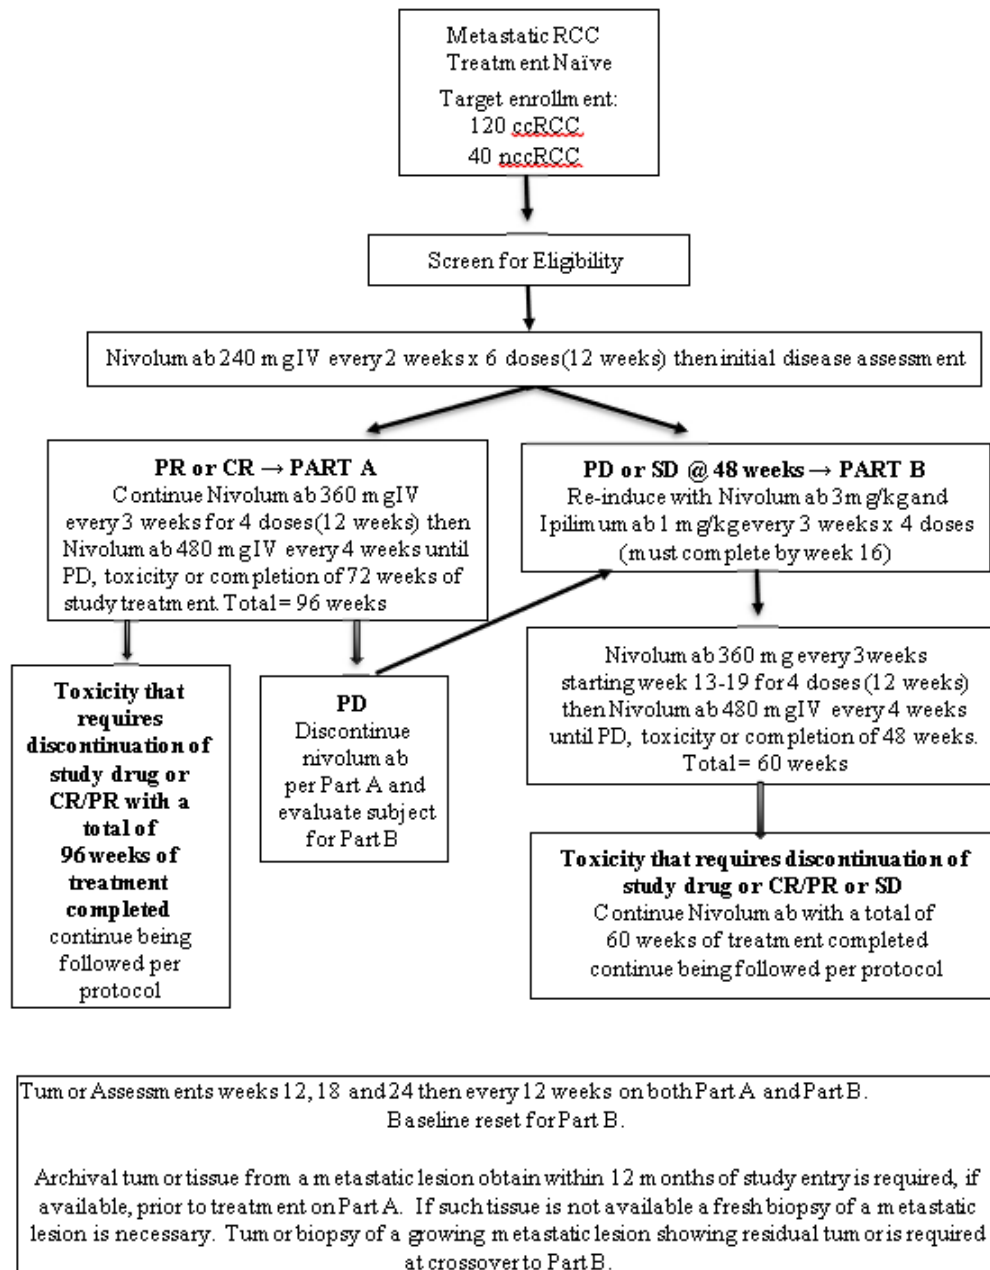

Supplement: jitc-2022-004780supp001_data_supplement.pdf [file jitc-2022-004780supp001_data_supplement.pdf]

**Duration of Response on Part A**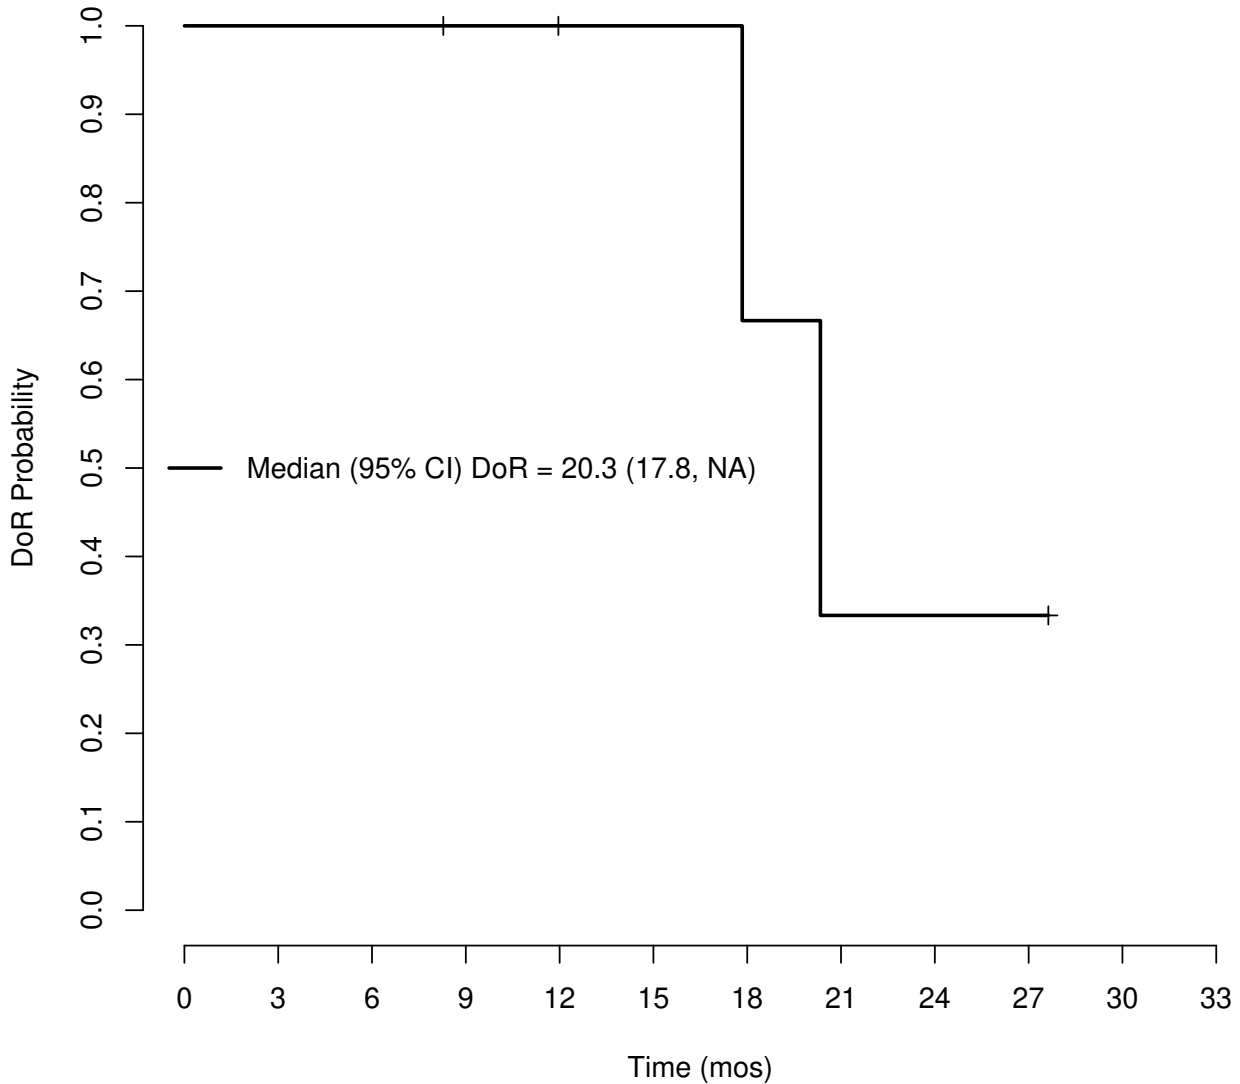

Supplement: jitc-2022-004780supp002_data_supplement.pdf [file jitc-2022-004780supp002_data_supplement.pdf]

### Swimmer Plot (n=35)

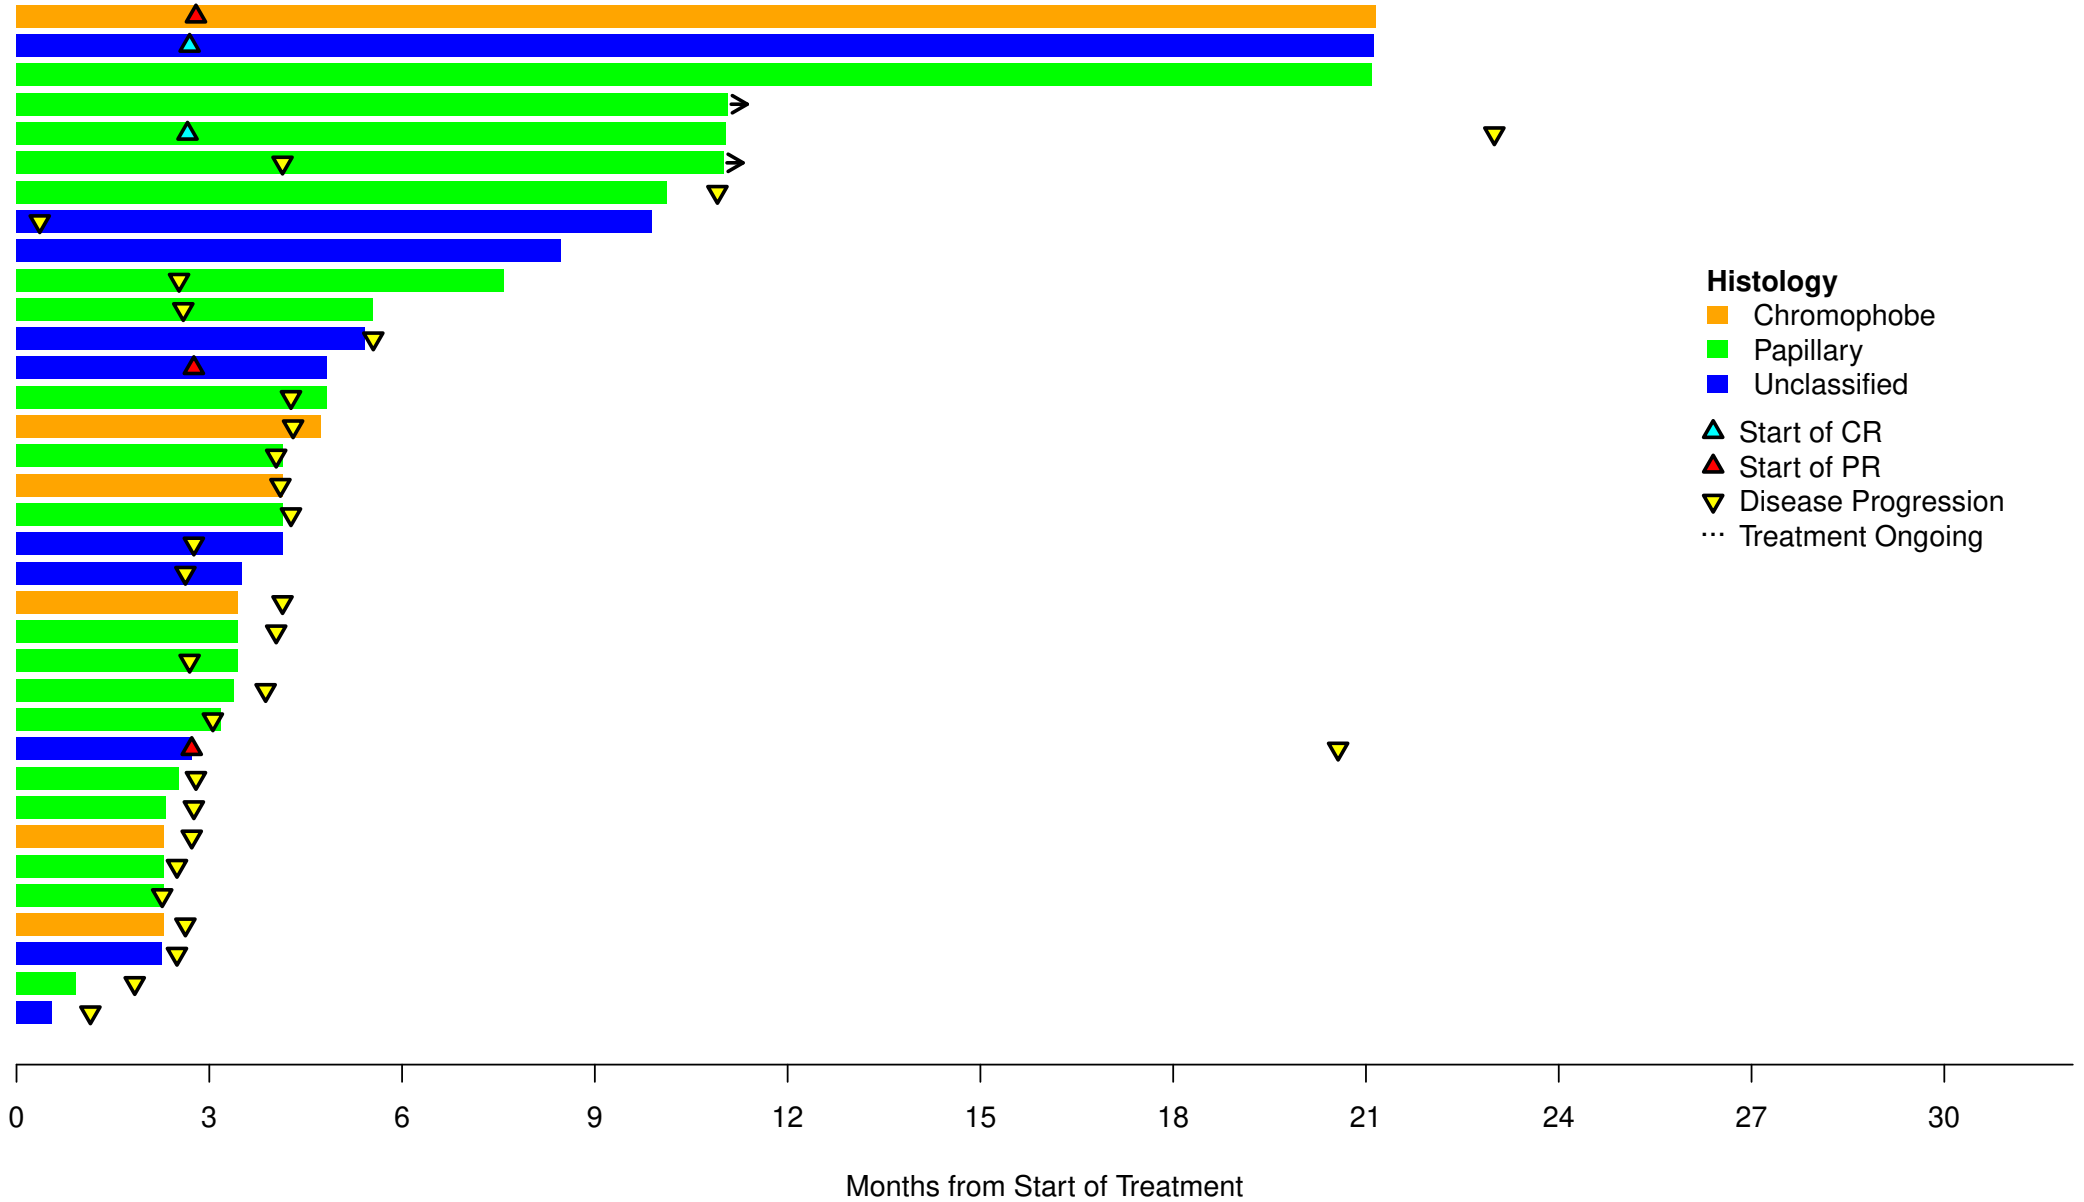

Supplement: jitc-2022-004780supp003_data_supplement.pdf [file jitc-2022-004780supp003_data_supplement.pdf]
